# Supplementary material for: The impact of methylation quantitative trait loci (mQTLs) on active smoking-related DNA methylation changes
Source: Clin Epigenetics. 2017 Aug 17;9:87. doi: 10.1186/s13148-017-0387-6 (PMC5561570; doi:10.1186/s13148-017-0387-6)

**Figure S2** Locations and distributions of methylation levels of 19 smoking-related CpG sites based on the three most frequently identified mQTLs (carrier/non-carrier) and smoking status in validation panel

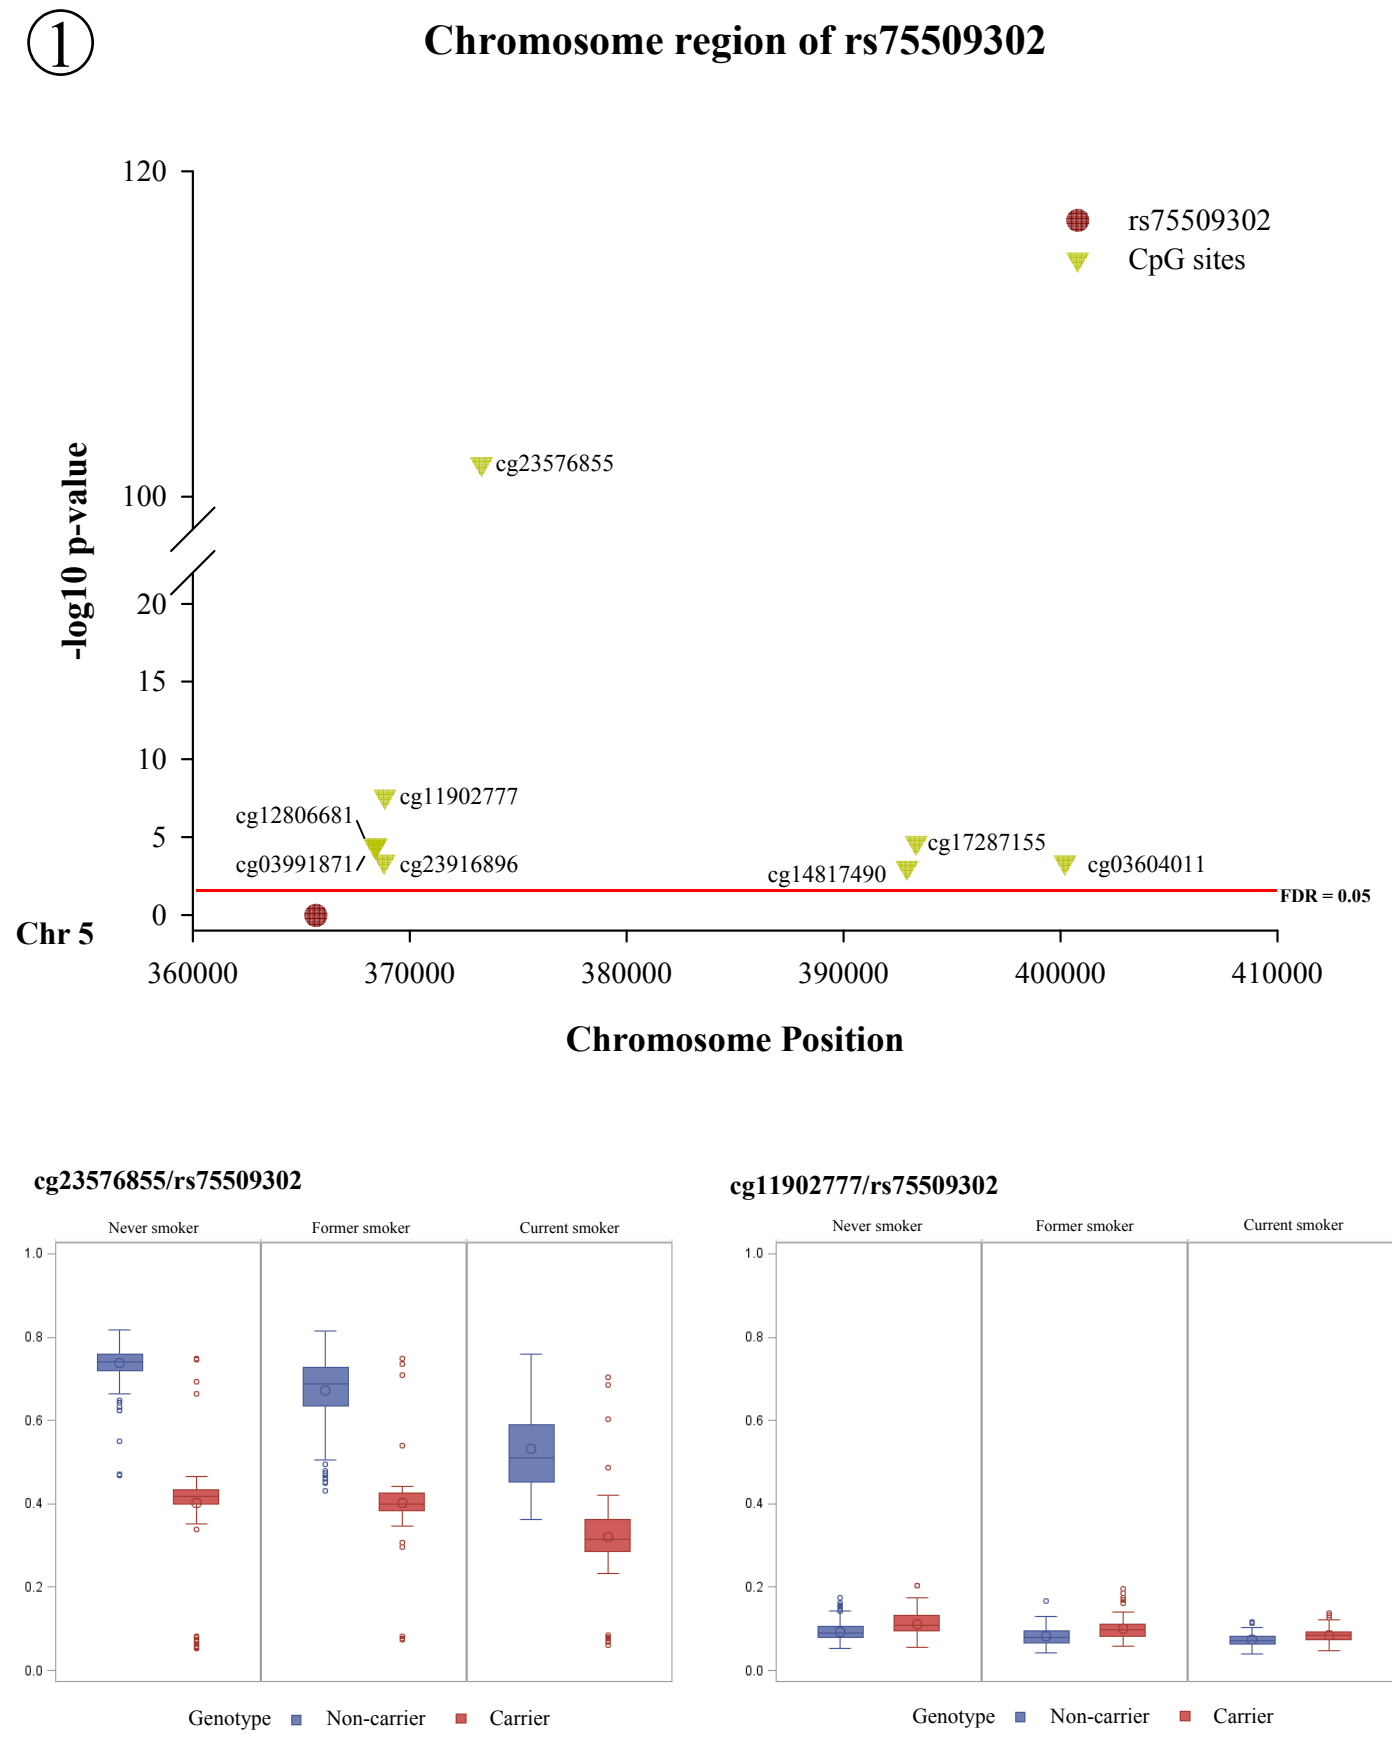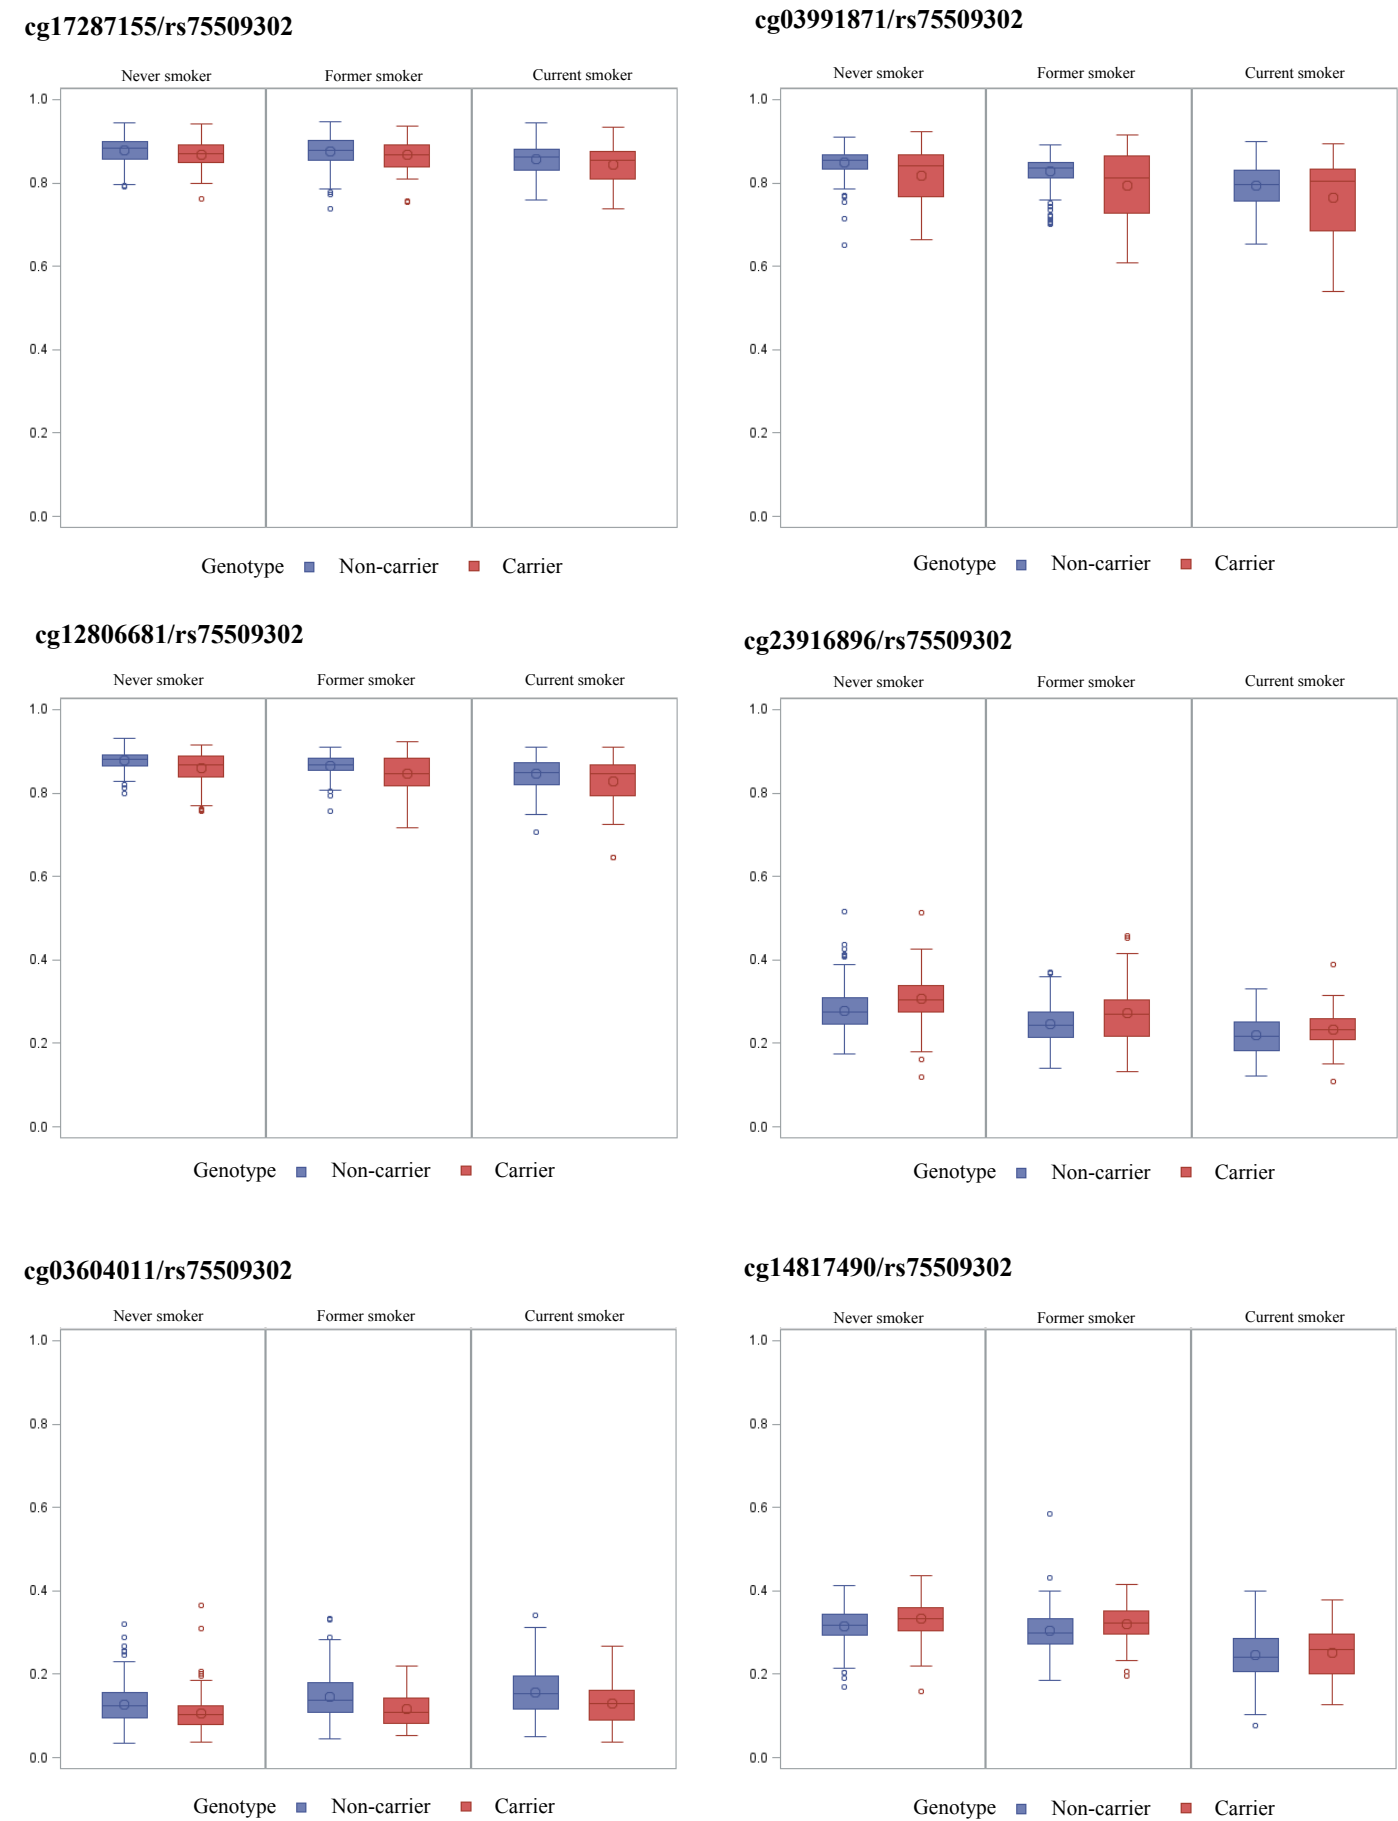

②

Chromosome region of rs34835481

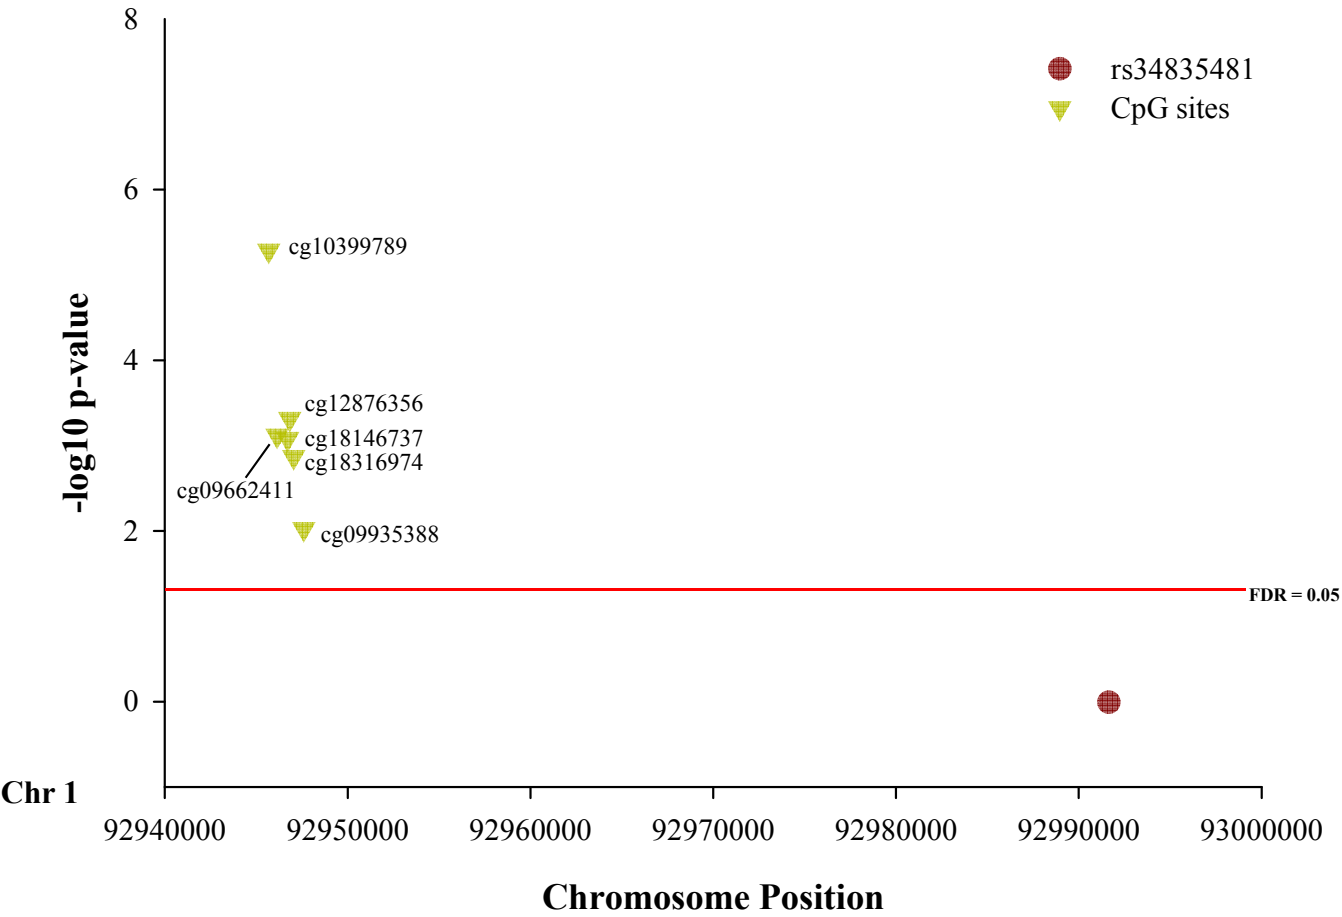

cg10399789/rs34835481

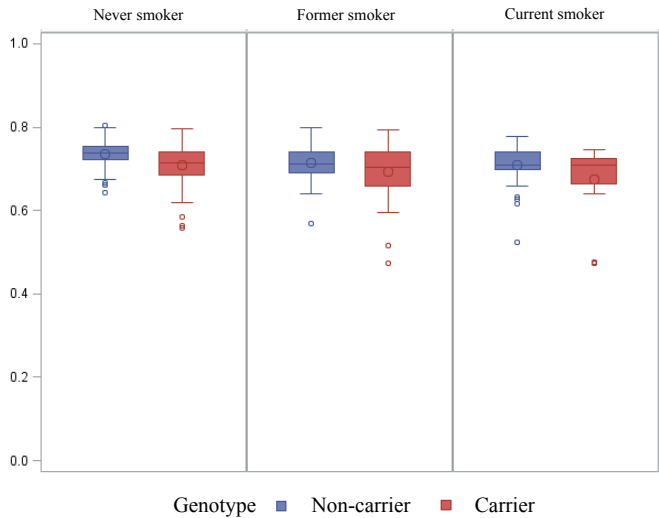

cg12876356/rs34835481

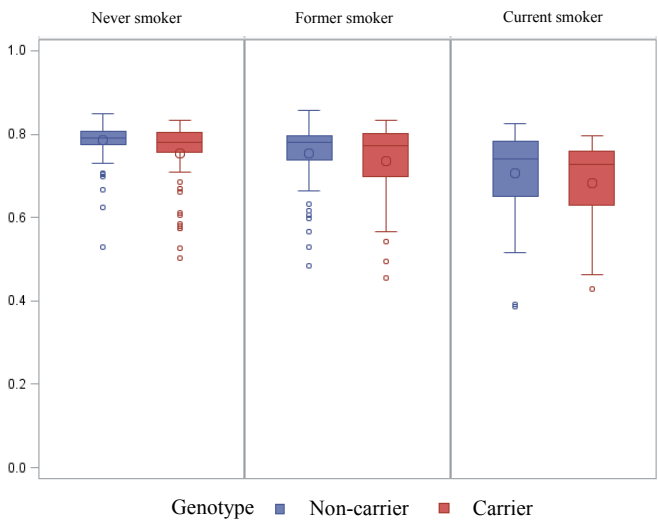

cg09662411/rs34835481

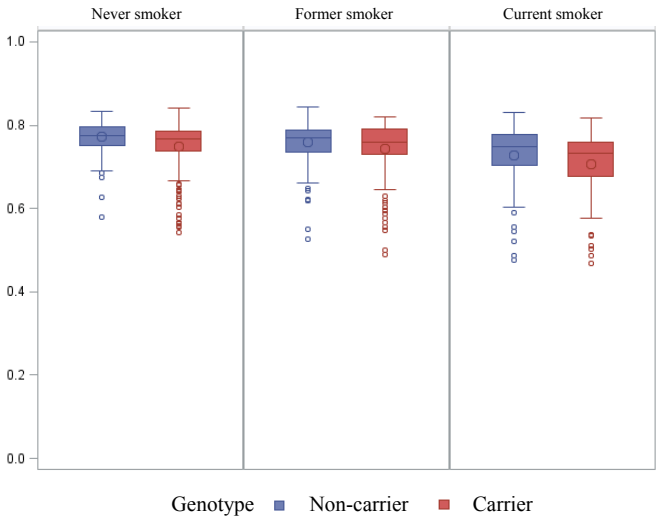

cg18146737/rs34835481

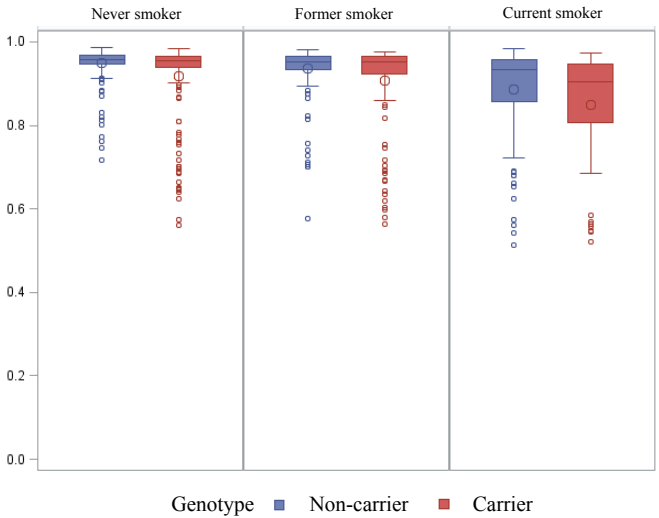

cg18316974/rs34835481

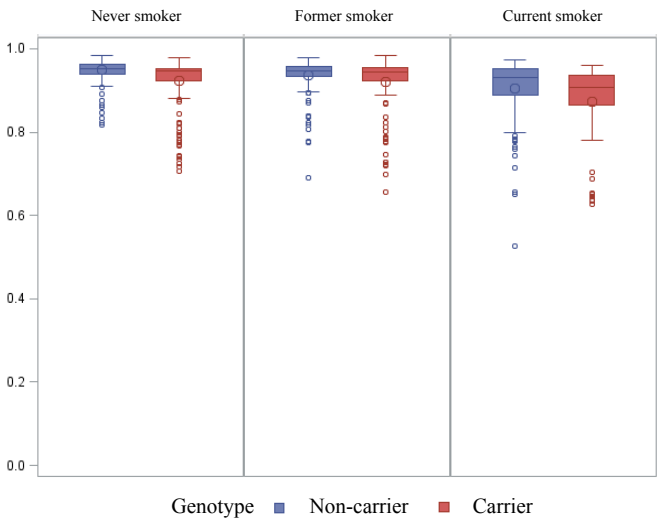

cg09935388/rs34835481

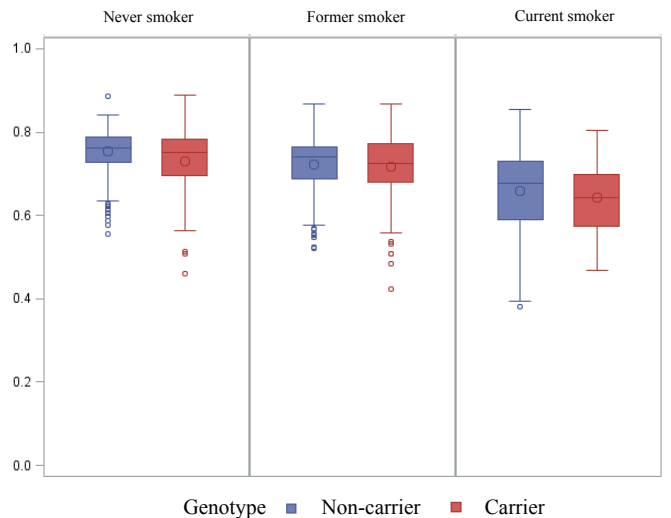

③

Chromosome region of rs79050605

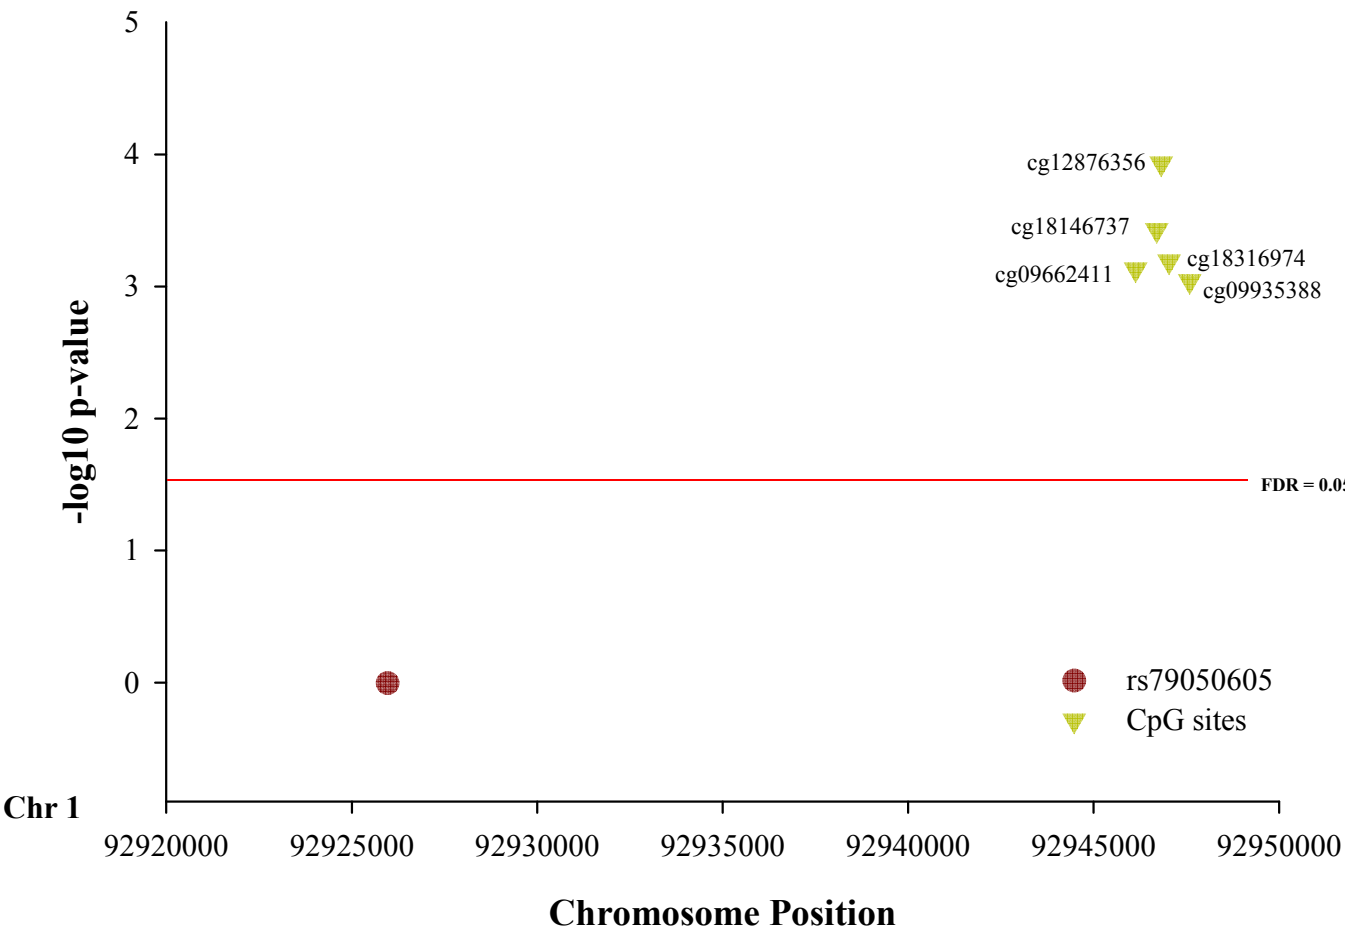

cg12876356/rs79050605

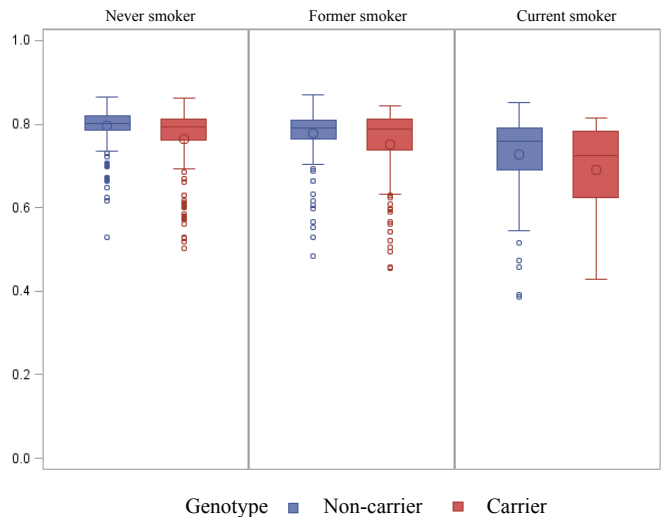

cg18146737/rs79050605

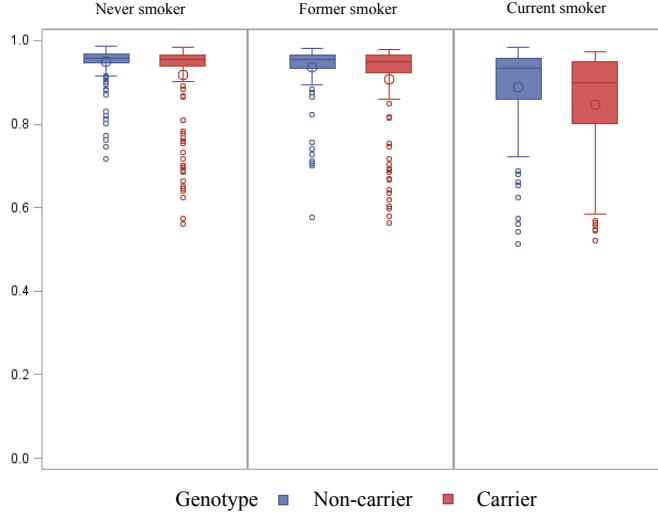

cg18316974/rs79050605

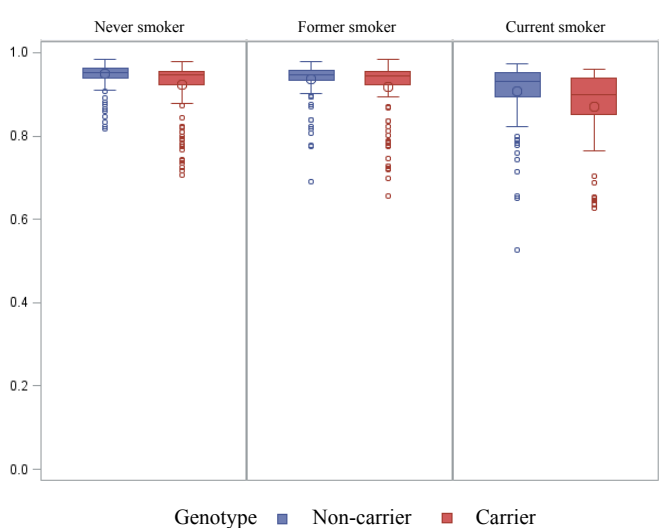

cg09662411/rs79050605

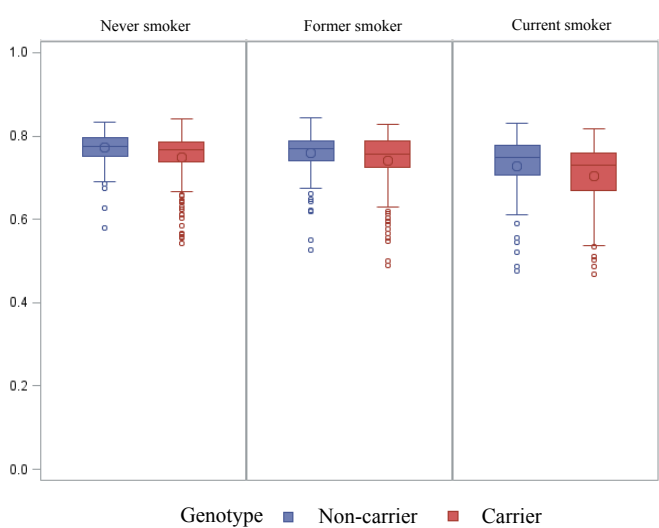

cg09935388/rs79050605

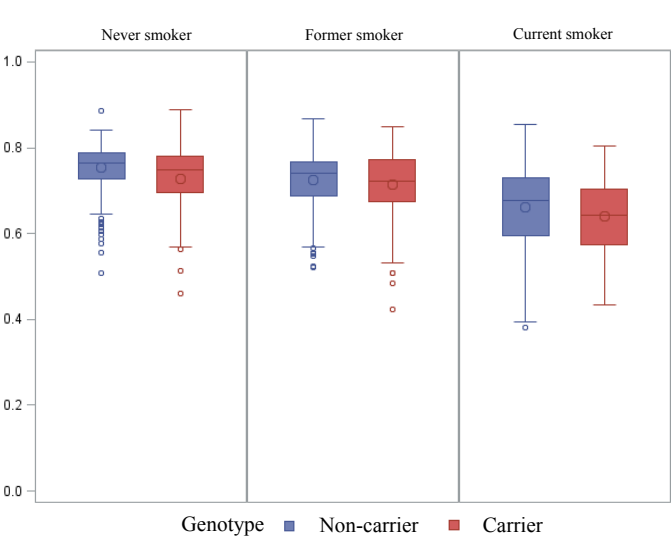

Supplement: Supplementary file 3 — Locations and distributions of methylation levels of 19 smoking-related CpG sites based on the three most frequently identified mQTLs (carrier/non-carrier) and smoking status in validation panel. (PDF 206 kb) [file 13148_2017_387_MOESM3_ESM.pdf]
