# Supplementary material for: The impact of methylation quantitative trait loci (mQTLs) on active smoking-related DNA methylation changes
Source: PubMed Central journal article supplement (PMC5561570; doi:10.1186/s13148-017-0387-6), 2017-08-17

**Figure S1** Manhattan plot of the results in discovery panel

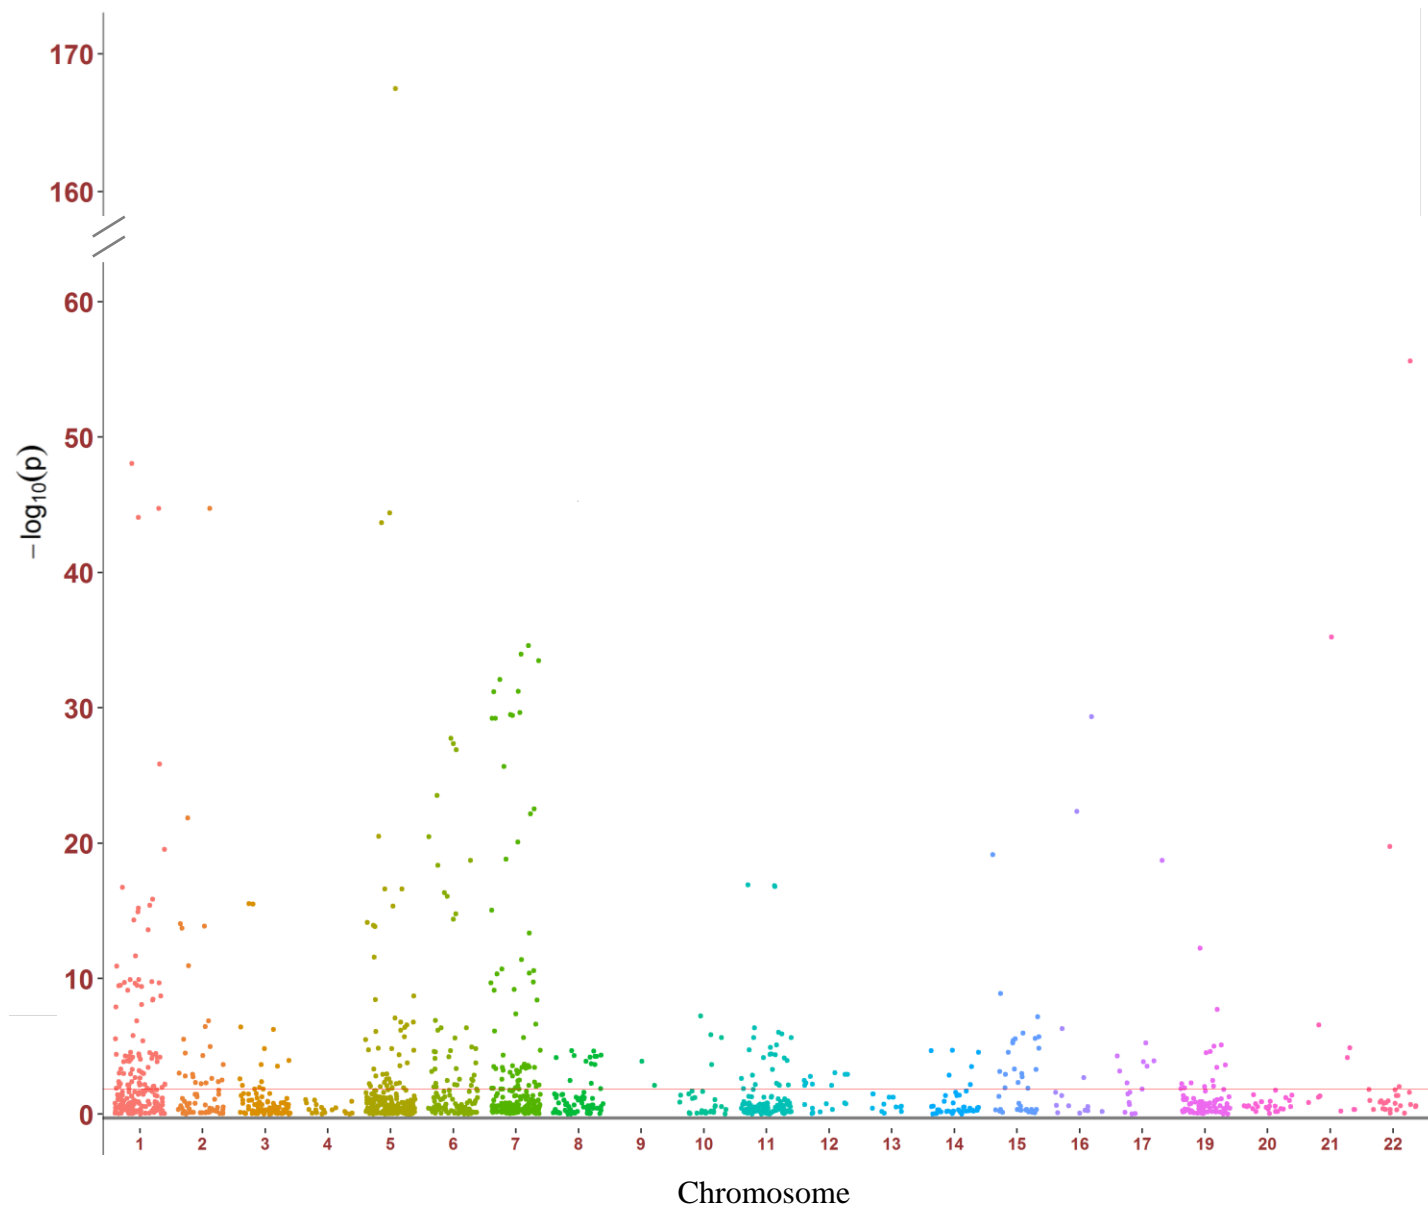

Supplement: 13148_2017_387_MOESM2_ESM.pdf [file 13148_2017_387_MOESM2_ESM.pdf]
